# Supplementary material for: Melatonin-Induced Inhibition of Shiraia Hypocrellin A Biosynthesis Is Mediated by Hydrogen Peroxide and Nitric Oxide
Source: MDPI journal article supplement (doi:10.3390/jof8080836), 2022-08-10
Supplement: s1 [file s1]

## **Electronic supplementary material**

### **Melatonin-induced Inhibition of *Shiraia* hypocrellin A Biosynthesis Is Mediated by Hydrogen Peroxide and Nitric Oxide**

Wen Juan Wang <sup>1</sup>, Qun Yan Huang <sup>1</sup>, Yue Wang<sup>1</sup>, Xin  
Ping Li <sup>1</sup>, Jian Wen Wang <sup>1</sup>, Li Ping Zheng<sup>2,\*</sup>

\*Correspondence: lpzheng@suda.edu.cn; Tel.: +86-521-  
65880195

**Table S1.** Primer and relevant information of reference and target genes.  
F: forward primer, R: reverse primer.

| Genes       | Gene Description                 | Name of Primer | Sequence                    |
|-------------|----------------------------------|----------------|-----------------------------|
| <i>18S</i>  | Reference gene                   | <i>18S</i> -F  | 5'-ACGCAGCGAAATGCGATAAG-3'  |
|             |                                  | <i>18S</i> -R  | 5'-CAAATTGTGCTGCGCTCCAA-3'  |
| <i>ZFTF</i> | zinc finger transcription factor | <i>ZFTF</i> -F | 5'-GAACACCGTCGCAAGATTCG-3'  |
|             |                                  | <i>ZFTF</i> -R | 5'-TCATTGGCATCGCTTGGAGT-3'  |
| <i>PKS</i>  | Polyketide synthase              | <i>PKS</i> -F  | 5'-GCAGATACGCCCCCTCACTAC-3' |
|             |                                  | <i>PKS</i> -R  | 5'-GTCGCTGGTAATATCGCCCA-3'  |
| <i>OmeF</i> | <i>O</i> -methyltransferase      | <i>OmeF</i> -F | 5'-GGGAGAGCGATACGCATTCA-3'  |
|             |                                  | <i>OmeF</i> -R | 5'-TACTGCAGCTGTCAACCAAGG-3' |
| <i>FAD</i>  | FAD/FMN-containing dehydrogenase | <i>FAD</i> -F  | 5'-ACGAGGTTTGGCATCGTCAT-3'  |
|             |                                  | <i>FAD</i> -R  | 5'-ACGAATATGCCCGACTCCAC-3'  |
| <i>Mono</i> | Salicylate 1-monooxygenase       | <i>Mono</i> -F | 5'-TCGCCCCGAAGTCTATCAAGC-3' |
|             |                                  | <i>Mono</i> -R | 5'-ACTCTCCTGAAAACCGAGCG-3'  |
| <i>MCO</i>  | Multicopper oxidase              | <i>MCO</i> -F  | 5'-TATGGCGCTACGAGTGGAC-3'   |
|             |                                  | <i>MCO</i> -R  | 5'-ACTCCCTGGCCGATAACGTA-3'  |
| <i>MFS</i>  | Major facilitator superfamily    | <i>MFS</i> -F  | 5'-CAGAAAGCAAGGCTACGGGA-3'  |
|             |                                  | <i>MFS</i> -R  | 5'-TCACCAAATCGCCGAAGGAA-3'  |
